# Supplementary material
Source: publisher figshare collection journal article supplement (https://karger.figshare.com/ndownloader/files/26652452)
Supplement: Supplementary file 1 [file 26652452]

**Supplemental table 1: Tumor characteristics and metastatic patterns at diagnosis for total group of neuroendocrine neoplasms and for subgroups of different primary origins (cohort national cancer registry)**

|  | All (%) | GE (%) | | | | Pancreas (%) | | | | Lung (%) | | | | Other (%) | Unknown (%) |
| --- | --- | --- | --- | --- | --- | --- | --- | --- | --- | --- | --- | --- | --- | --- | --- |
|  |  | All grades | G1 | G2 | G3 | All grades | G1 | G2 | G3 | All grades | G1 | G2 | G3 | All grades | All grades |
| Total number | 11,120 | 4,710 | 3,248 | 479 | 935 | 1,150 | 534 | 254 | 277 | 2,978 | 912 | 301 | 1765 | 1,075 | 1,207 |
| Stage |  |  |  |  |  |  |  |  |  |  |  |  |  |  |  |
| Non-stage IV | 6,352 (57) | 3,206 (68) | 2,657 (82) | 216 (45) | 302 (32) | 661 (58) | 395 (74) | 107 (42) | 89 (32) | 1,748 (59) | 833 (91) | 225 (75) | 690 (39) | 737 (69) | 0 (0) |
| Stage IV | 4,768 (43) | 1,504 (32) | 591 (18) | 263 (55) | 633 (68) | 489 (43) | 139 (26) | 147 (58) | 188 (68) | 1,230 (41) | 79 (9) | 76 (25) | 1,075 (61) | 338 (32) | 1,207 (100) |
| Location metastases |  |  |  |  |  |  |  |  |  |  |  |  |  |  |  |
| Liver | 3,125 (28) | 1,158 (25) | 420 (13) | 224 (47) | 499 (53) | 447 (39) | 126 (24) | 137 (54) | 169 (61) | 568 (19) | 31 (3) | 49 (16) | 488 (28) | 158 (15) | 794 (66) |
| Brain | 332 (3) | 7 (0) | 2 (0) | 0 (0) | 5 (1) | 4 (0) | 0 (0) | 2 (1) | 2 (1) | 268 (9) | 6 (1) | 8 (3) | 254 (14) | 5 (0) | 48 (4) |
| Lung | 615 (6) | 139 (3) | 22 (1) | 13 (3) | 104 (11) | 33 (3) | 9 (2) | 5 (2) | 18 (6) | 201 (7) | 33 (4) | 10 (3) | 158 (9) | 83 (8) | 159 (13) |
| Bone | 1041 (9) | 208 (4) | 56 (2) | 51 (11) | 98 (10) | 51 (4) | 10 (2) | 20 (8) | 19 (7) | 425 (14) | 26 (3) | 39 (13) | 360 (20) | 136 (13) | 221 (18) |
| Lymph nodes (distant) | 1,236 (11) | 360 (8) | 106 (3) | 41 (9) | 209 (22) | 89 (8) | 20 (4) | 31 (12) | 36 (13) | 185 (6) | 8 (1) | 7 (2) | 170 (10) | 135 (13) | 467 (39) |
| Peritoneal | 605 (5) | 361 (8) | 200 (6) | 85 (18) | 72 (8) | 32 (3) | 7 (1) | 8 (3) | 17 (6) | 26 (9) | 2 (0) | 2 (1) | 22 (1) | 14 (1) | 172 (14) |
| Other | 1,018 (9) | 176 (4) | 91 (3) | 29 (6) | 54 (6) | 35 (3) | 5 (1) | 11 (4) | 17 (6) | 450 (15) | 16 (2) | 23 (8) | 411 (23) | 43 (4) | 314 (26) |

*Abbreviations: GE = gastroenteral; G1 = grade 1; G2 = grade 2; G3 = grade 3. * The total of all grades might be higher than the sum of grade 1, grade 2 and grade 3 tumors, because of presence of tumors with unknown grade.*
